# Supplementary material for: Humoral and Cellular Immunity Are Significantly Affected in Renal Transplant Recipients, following Vaccination with BNT162b2
Source: MDPI journal article supplement (doi:10.3390/vaccines11111670), 2023-10-31
Supplement: s1 [file s1]

## Supplementary Material

# Humoral and Cellular Immunity Are Significantly Affected in Renal Transplant Recipients, following Vaccination with BNT162b2

Asimina Fylaktou <sup>1</sup>, Stamatia Stai <sup>2,3</sup>, Efstratios Kasimatis <sup>2</sup>, Aliko Xochelli <sup>1</sup>, Vasiliki Nikolaidou <sup>1</sup>, Anastasia Papadopoulou <sup>4</sup>, Grigorios Myserlis <sup>5</sup>, Georgios Lioulis <sup>2,3</sup>, Despoina Asouchidou <sup>1</sup>, Maria Giannaki <sup>4</sup>, Evangelia Yannaki <sup>4</sup>, Georgios Tsoulfas <sup>3,5</sup>, Aikaterini Papagianni <sup>2,3</sup> and Maria Stangou <sup>2,3,\*</sup>

<sup>1</sup> Department of Immunology, National Histocompatibility Center, Hippokration General Hospital, 54642 Thessaloniki, Greece; fylaktoumina@gmail.com (A.F.); aliki.xochelli@gmail.com (A.X.); basoniko@hotmail.com (V.N.); deasouh@gmail.com (D.A.)

<sup>2</sup> Department of Nephrology, Hippokration Hospital, 54642 Thessaloniki, Greece; staimatina@yahoo.gr (S.S.); frasci@outlook.com.gr (E.K.); pter43@yahoo.gr (G.L.); aikpapag@auth.gr (A.P.)

<sup>3</sup> School of Medicine, Aristotle University of Thessaloniki, 54124 Thessaloniki, Greece; tsoulfas@auth.gr

<sup>4</sup> Hematology Department-Hematopoietic Cell Transplantation Unit, Gene and Cell Therapy Center, "George Papanikolaou" Hospital, 57010 Thessaloniki, Greece; papada\_1@hotmail.com (A.P.); giannakimar@hotmail.com (M.G.); eyannaki@uw.edu (E.Y.)

<sup>5</sup> Department of Transplant Surgery, Hippokration Hospital, 54642 Thessaloniki, Greece; gmyserlis@gmail.com

\* Correspondence: mstangou@auth.gr; Tel.: +30-2310892030

**Supplementary Table S1.** Record of performed blood samplings

| Blood Sample (BS) |              |                                                           |
|-------------------|--------------|-----------------------------------------------------------|
| Number            | Abbreviation | Time Points                                               |
| 1 <sup>st</sup>   | BS1          | 48 hours before dose 1                                    |
| 2 <sup>nd</sup>   | BS2          | 48 hours before dose 2                                    |
| 3 <sup>rd</sup>   | BS3          | 3 weeks after dose 2                                      |
| 4 <sup>th</sup>   | BS4          | 48 hours before dose 3 (Identifies 4 months after dose 2) |
| 5 <sup>th</sup>   | BS5          | 3 weeks after dose 3                                      |

|                 |     |                                                              |
|-----------------|-----|--------------------------------------------------------------|
| 6 <sup>th</sup> | BS6 | 48 hours before dose 4<br>(Identifies 4 months after dose 3) |
| 7 <sup>th</sup> | BS7 | 3 weeks after dose 4                                         |

**Supplementary Table S2.** Cluster of Differentiation (CD) detected on B- and T- lymphocytes

**CD**

**markers      Fluorochrome      Clone**

CD45      KROME      J33

**B-cell markers**

CD19      PC7      J4.119

IgD      FITC      IA6-2

CD27      ECD      IA4CD27

CD24      SN3      PerCP-Cy5.5

CD38      A750      LS198-4-3

**T-cell markers**

CD3      FITC      UCHT1

CD4      APC      13B8.2

CD8      PC5.5      B9.11

CD56      A700      N901NKH-1

HLA-DR      PB      Immu-357

CD38      A750      LS198-4-3

PD1      PE      EH12.2H7

**Supplementary Table S3.** Patient Demographics

| <b>N</b>                          | <b>57</b>     |
|-----------------------------------|---------------|
| Male/Female                       | 34/23         |
| Age (years)                       | 48(19)        |
| Transplantation Vintage (years)   | 9.1(14)       |
| Hemodialysis Vintage (months)     | 18(46)        |
| eGFR (mL/min/1.73m <sup>2</sup> ) | 54.3(20.3)    |
| Tacrolimus levels (ng/mL)         | 6(1.5)        |
| Cyclosporine levels (ng/mL)       | 268.5(222)    |
| Preemptive Kidney transplantation | 19.3% (11/57) |
| Retransplantation history         | 19.3% (11/57) |
| Diabetes Mellitus history         | 7% (4/57)     |
| Treatment with mycophenolic acid  | 84.2% (48/57) |

**Supplementary Table 4.** Presentation of the number (and percentage) of patients who developed serum levels of anti-RBD Abs and Nabs above the threshold and were regarded as responders, at the relevant time points

|                     | <b>BS1</b> | <b>BS2</b>    | <b>BS3</b>    | <b>BS4</b>    | <b>BS5</b>    | <b>BS6</b>    | <b>BS7</b>    |
|---------------------|------------|---------------|---------------|---------------|---------------|---------------|---------------|
| <b>Anti-RBD Abs</b> | 0%         | 6/57 (10.53%) | 27/57(47.37%) | 25/57(44.86%) | 49/57(85.96%) | 45/57(78.95%) | 53/57(92.98%) |
| <b>NAbs</b>         | 0%         | 4/57 (7.02%)  | 18/57(31.58%) | 6/57(10.53%)  | 40/57(70.18%) | 39/57(68.42%) | 53/57(92.98%) |

Abbreviations: Anti-RBD Abs: anti-receptor binding domain antibodies; BS, blood sampling; and Nabs, neutralizing antibodies.

**Supplementary Table S5.** Differences in eGFR levels at time of first vaccination dose, and in HDV, between responders and non-responders to BNT162b2

| eGFR levels (ml/min/1.73m <sup>2</sup> ) |            |                |       |            |            |                |       |
|------------------------------------------|------------|----------------|-------|------------|------------|----------------|-------|
| Anti-RBD                                 | responders | non-responders | p     | NAb titers | responders | non-responders | p     |
| Ab titers                                |            |                |       |            |            |                |       |
| <b>BS2</b>                               | 51.3±14.5  | 54.4±14.9      | NS    | <b>BS2</b> | 61±3.6     | 53.5±14.9      | NS    |
| <b>BS3</b>                               | 61.4±15.9  | 52.5±14.9      | 0.042 | <b>BS3</b> | 57.2±10.7  | 56.7±16.8      | NS    |
| <b>BS4</b>                               | 58.5±15.4  | 50±18.1        | NS    | <b>BS4</b> | 61.1±14.3  | 49.5 ± 13.2    | 0.04  |
| <b>BS5</b>                               | 58.1±17    | 48±16.7        | NS    | <b>BS5</b> | 59.2±15.8  | 51.4±19.4      | NS    |
| <b>BS6</b>                               | 60±13.8    | 46.3±14.6      | 0.039 | <b>BS6</b> | 61±12.3    | 49.5±13.2      | 0.04  |
| <b>BS7</b>                               | 60.1±14.3  | -              | -     | <b>BS7</b> | 61.1±14.6  | 48.5±4.9       | NS    |
| HDV (months)                             |            |                |       |            |            |                |       |
| Anti-RBD                                 | responders | non-responders | p     | NAb titers | responders | non-responders | p     |
| Ab titers                                |            |                |       |            |            |                |       |
| <b>BS2</b>                               | 3.5(38)    | 26.5(47)       | NS    | <b>BS2</b> | 3.5(-)     | 21(46)         | NS    |
| <b>BS3</b>                               | 17.5(42)   | 18.5(50)       | NS    | <b>BS3</b> | 3(7)       | 22.5(44)       | 0.038 |
| <b>BS4</b>                               | 15.5(38)   | 21(61)         | NS    | <b>BS4</b> | 32(-)      | 15.5(44)       | NS    |
| <b>BS5</b>                               | 24(42)     | 41(54)         | NS    | <b>BS5</b> | 14.5(37)   | 50.5(77)       | 0.043 |
| <b>BS6</b>                               | 24(42)     | 23(74)         | NS    | <b>BS6</b> | 24(39)     | 25(70)         | NS    |
| <b>BS7</b>                               | 33.5(58)   | -              | -     | <b>BS7</b> | 28(39)     | 41(-)          | NS    |

Abbreviations: Anti-RBD Abs, anti-receptor binding domain antibodies; BS, blood sampling; eGFR, estimated glomerular filtration rate; HDV, hemodialysis vintage; Nabs, neutralizing antibodies; and NS, non-significant.

**Supplementary Table S6.** Anti-SARS-CoV-2 antibody development with regards to MPA treatment

| anti-RBD Abs |             |       |             | Nabs        |       |             |
|--------------|-------------|-------|-------------|-------------|-------|-------------|
|              | p           | OR    | CI          | p           | OR    | CI          |
|              | (MPA+/MPA-) |       |             | (MPA+/MPA-) |       |             |
| <b>BS2</b>   | NS          | -     | -           | 0.001       | 0.057 | 0.015-0.219 |
| <b>BS3</b>   | NS          | -     | -           | 0.003       | 0.048 | 0.007-0.346 |
| <b>BS4</b>   | NS          | -     | -           | NS          | -     | -           |
| <b>BS5</b>   | NS          | -     | -           | NS          | -     | -           |
| <b>BS6</b>   | 0.005       | 0.022 | 0.001-0.313 | NS          | -     | -           |
| <b>BS7</b>   | NS          | -     | -           | NS          | -     | -           |

Abbreviations: Anti-RBD Abs, anti-receptor binding domain antibodies; BS, blood sampling; CI, confidence interval; MPA, mycophenolic acid; Nabs, neutralizing antibodies; and OR, odds ratio.

**Supplementary Table S7.** Cell subpopulation concentrations (cells/ $\mu$ L) in BS1 and BS3 [NAb(-) patients in BS3]

|                               | <b>BS1</b>   | <b>BS3</b>   | <b>p (BS1 vs. BS3)</b> |
|-------------------------------|--------------|--------------|------------------------|
| <b>WBC</b>                    | 7850(2325)   | 7650(1750)   | NS                     |
| <b>Lymphocytes</b>            | 1621.5(1198) | 1861(851)    | NS                     |
| <b>B-cells</b>                | 68(107)      | 66(101)      | NS                     |
| <b>Naïve B-cells</b>          | 48.5(83)     | 46(72)       | NS                     |
| <b>Transitional B-cells</b>   | 3(10)        | 1.5(2)       | 0.014                  |
| <b>Marginal B-cells</b>       | 10.9(12.2)   | 9.7(9.2)     | NS                     |
| <b>Memory B-cells</b>         | 13(31)       | 18(24)       | NS                     |
| <b>Plasmablasts</b>           | 0.85(3.4)    | 0(0.4)       | 0.003                  |
| <b>CD3+ T-cells</b>           | 1314(1102)   | 1528(877)    | NS                     |
| <b>CD3+CD4+ T-cells</b>       | 832(584)     | 921(525)     | NS                     |
| <b>Activated CD4+ T-cells</b> | 5.5(6)       | 7.5(5)       | NS                     |
| <b>CD3+CD8+ T-cells</b>       | 527.5(563)   | 560(322)     | NS                     |
| <b>Activated CD8+ T-cells</b> | 7(10)        | 19.5(28)     | <0.001                 |
| <b>CD3+PD1+ T-cells</b>       | 79(94)       | 52(49)       | 0.029                  |
| <b>CD3-CD56+ (NK cells)</b>   | 21.1(65.5)   | 170.5(133.2) | <0.0001                |
| <b>CD3+CD56+ (NKT)</b>        | 160.5(172)   | 143(140)     | NS                     |
| <b>cells</b>                  |              |              |                        |
| <b>Activated NKT cells</b>    | 1(3)         | 2(4)         | 0.015                  |
| <b>Monocytes</b>              | 411(374)     | 511(281)     | NS                     |
| <b>Activated monocytes</b>    | 211(217)     | 360.5(221)   | 0.025                  |

---

Abbreviations: BS, blood sampling; CD, cluster of differentiation; NK, Natural Killer; NKT-cells, Natural Killer like T-cells; and NS, non-significant.

---

## Supplementary Figures

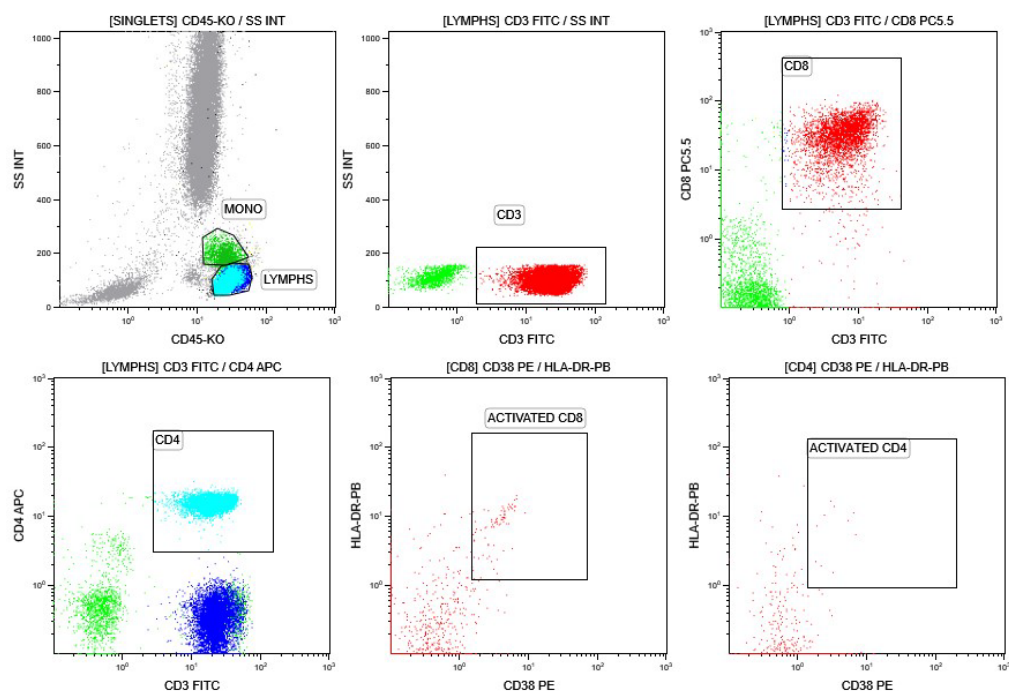

**Supplementary Figure S1.** Gating strategy for CD3, CD4, CD8 and Activated CD4, Activated CD8 respectively.

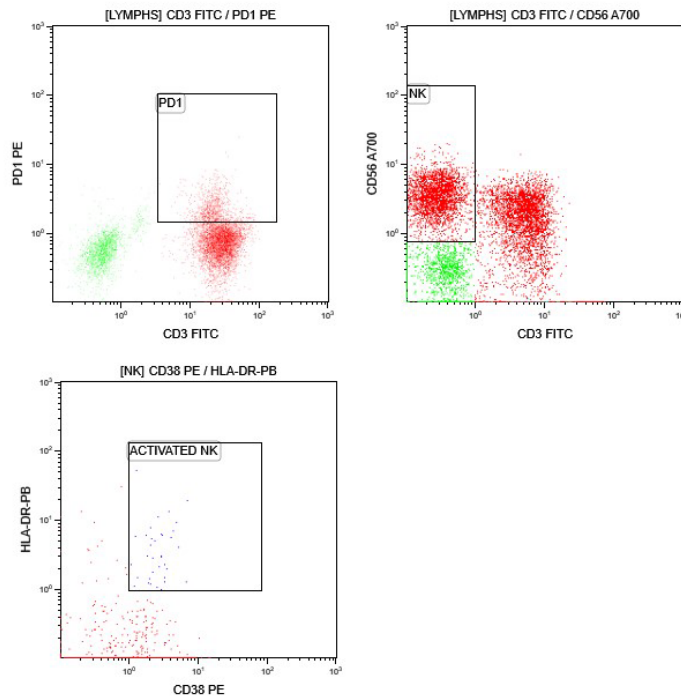

**Supplementary Figure S2.** Gating strategy for CD3-CD56+ (Natural Killer – NK-) cells and Activated NK cells.



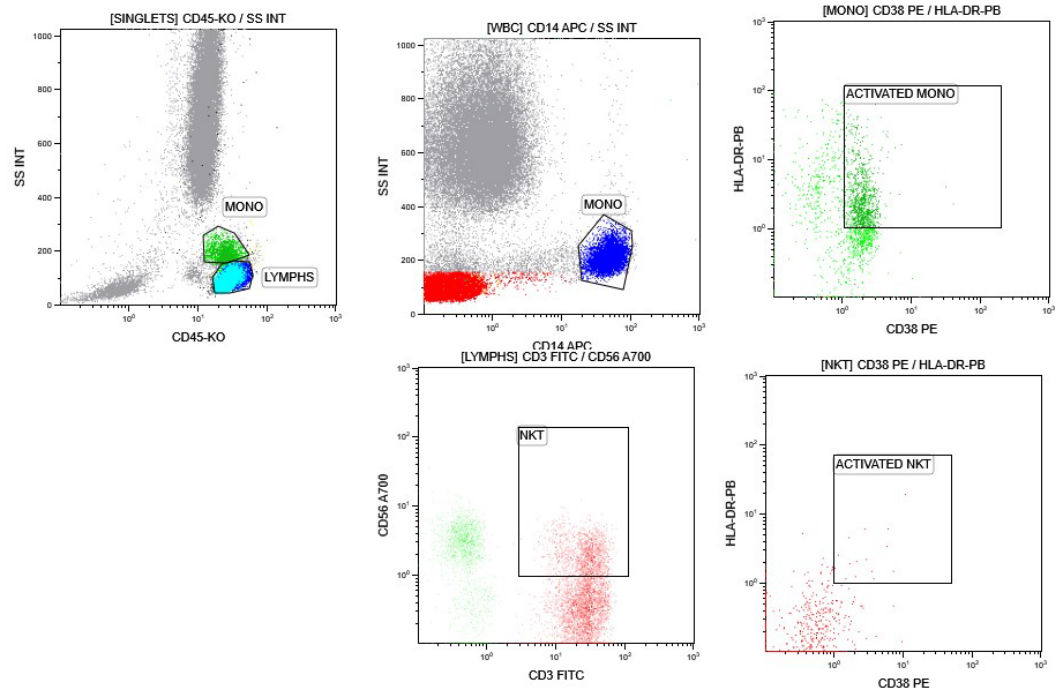

**Supplementary Figure S3.** Gating strategy for Monocytes and Activated Monocytes, CD3+CD56+ (NKT-cells) and Activated NKT-cells.

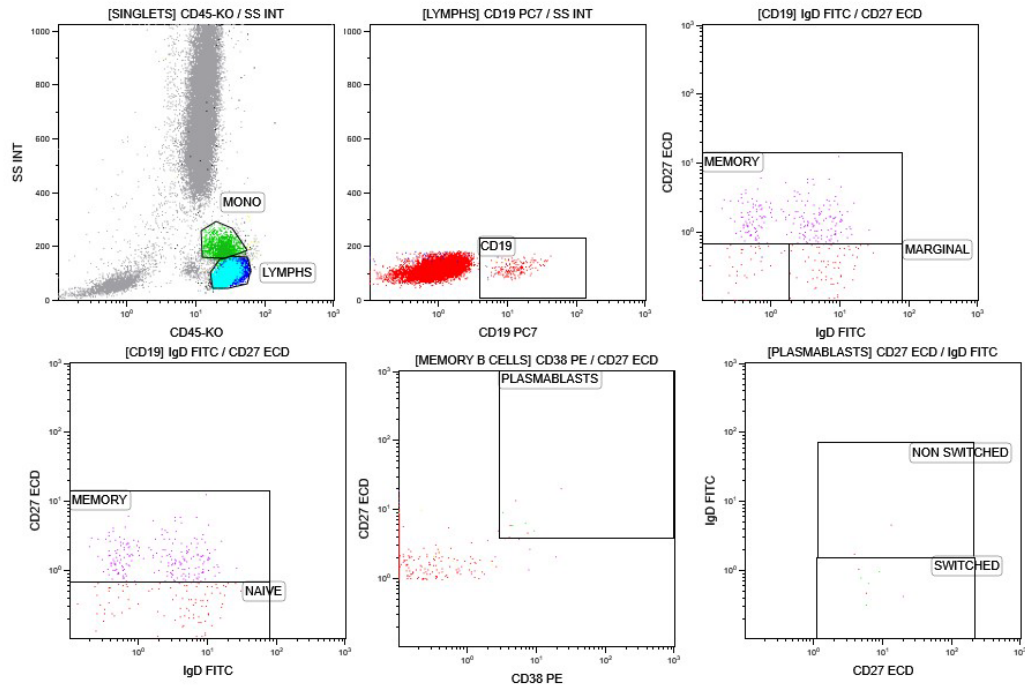

**Supplementary Figure S4.** Gating strategy for CD19<sup>+</sup> cells, CD19<sup>+</sup>CD27<sup>-</sup> (naïve), CD19<sup>+</sup>CD27<sup>+</sup> (memory), CD19<sup>+</sup>CD27<sup>-</sup>IgD<sup>+</sup> (marginal), CD19<sup>+</sup>CD27<sup>+</sup>CD38<sup>+</sup>(plasmablasts), CD19<sup>+</sup>CD27<sup>+</sup>IgD<sup>+</sup> (non switched) and CD19<sup>+</sup>CD27<sup>+</sup>IgD<sup>-</sup>(switched) cells.

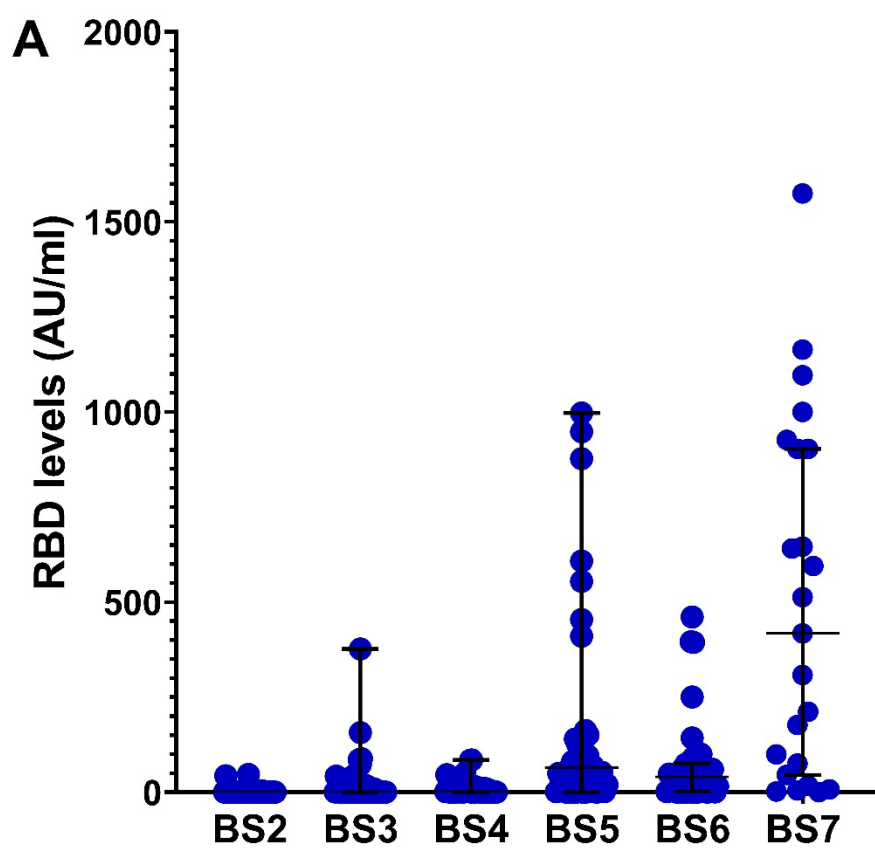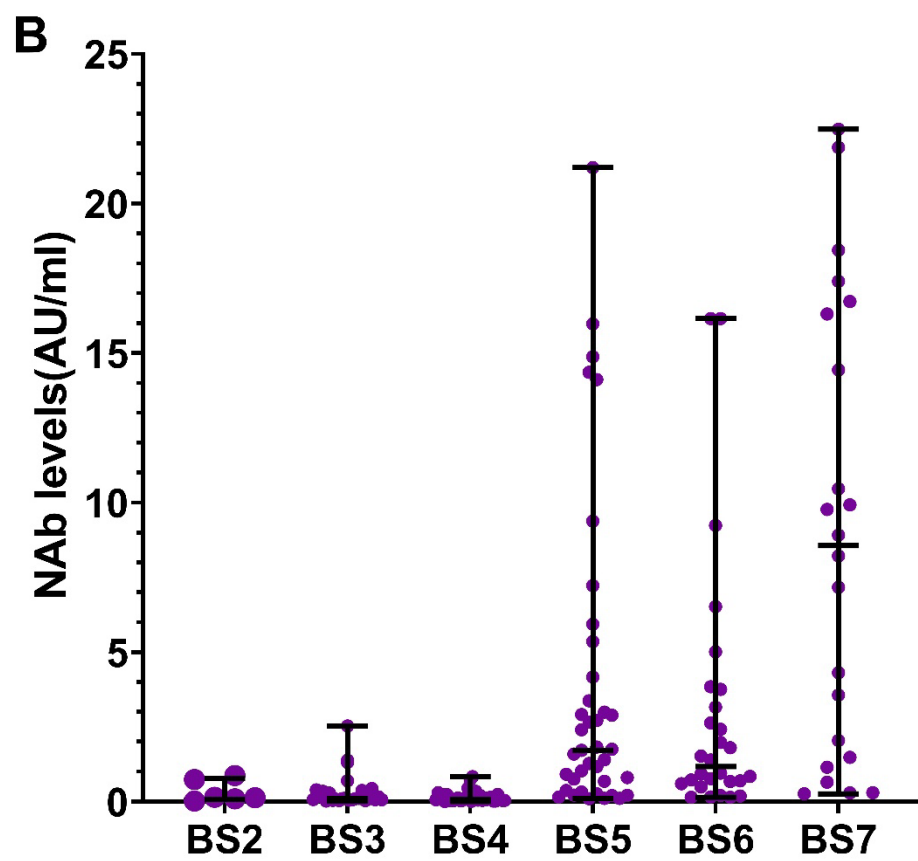

**Supplementary Figure S5.** Serum levels of anti-RBD Abs (A) and NAbs (B) at certain time points after vaccination, during follow up, BS2, BS3, BS4, BS5, BS6, BS7. Levels at baseline, BS1, are not demonstrated because they were zero.
